# MIND TO MIND

*Creative writing that explores the abstract side  
of our profession and our lives*

*Carol Wiley Cassella, M.D., Editor*

## A Foot

Audrey Shafer, M.D.\*

I  
ntestines and their manila frill of fat  
nestle cozily in a metal bowl

but a foot  
can't be contained even by a tub;  
jutting over the edge  
the calf exposes its brutal ovoid slice

a foot  
perhaps with purple gangrene  
black-lipped ulcers  
toes already missing  
itches to hop off  
a mutant bunny on the lam

a foot  
could jerk its big toe to hitch a ride  
or, impatient  
stomp out of the operating room

anything to forget the fine crack of bone  
from bone

\*Stanford University School of Medicine and Veterans Affairs Palo Alto Health Care System, Palo Alto, California. [ashafer@stanford.edu](mailto:ashafer@stanford.edu)  
Accepted for publication December 6, 2010.

but even if the foot flees the scene  
the nonfoot remains  
below the stump, below the wound  
sealed by interrupted sutures  
perfect blue knots teething a frozen smile  
see, there it is  
faux foot, doppelgänger foot,  
ghost foot.
